# Supplementary material
Source: Research Square preprint supplement (doi:10.21203/rs.3.rs-9570797/v1)
Supplement: Supplementary file 1 [file 5b0ef7008cd5bfe4655a2439.docx]

**Supplementary Materials**

This section is appended for review convenience and can be separated during journal submission.


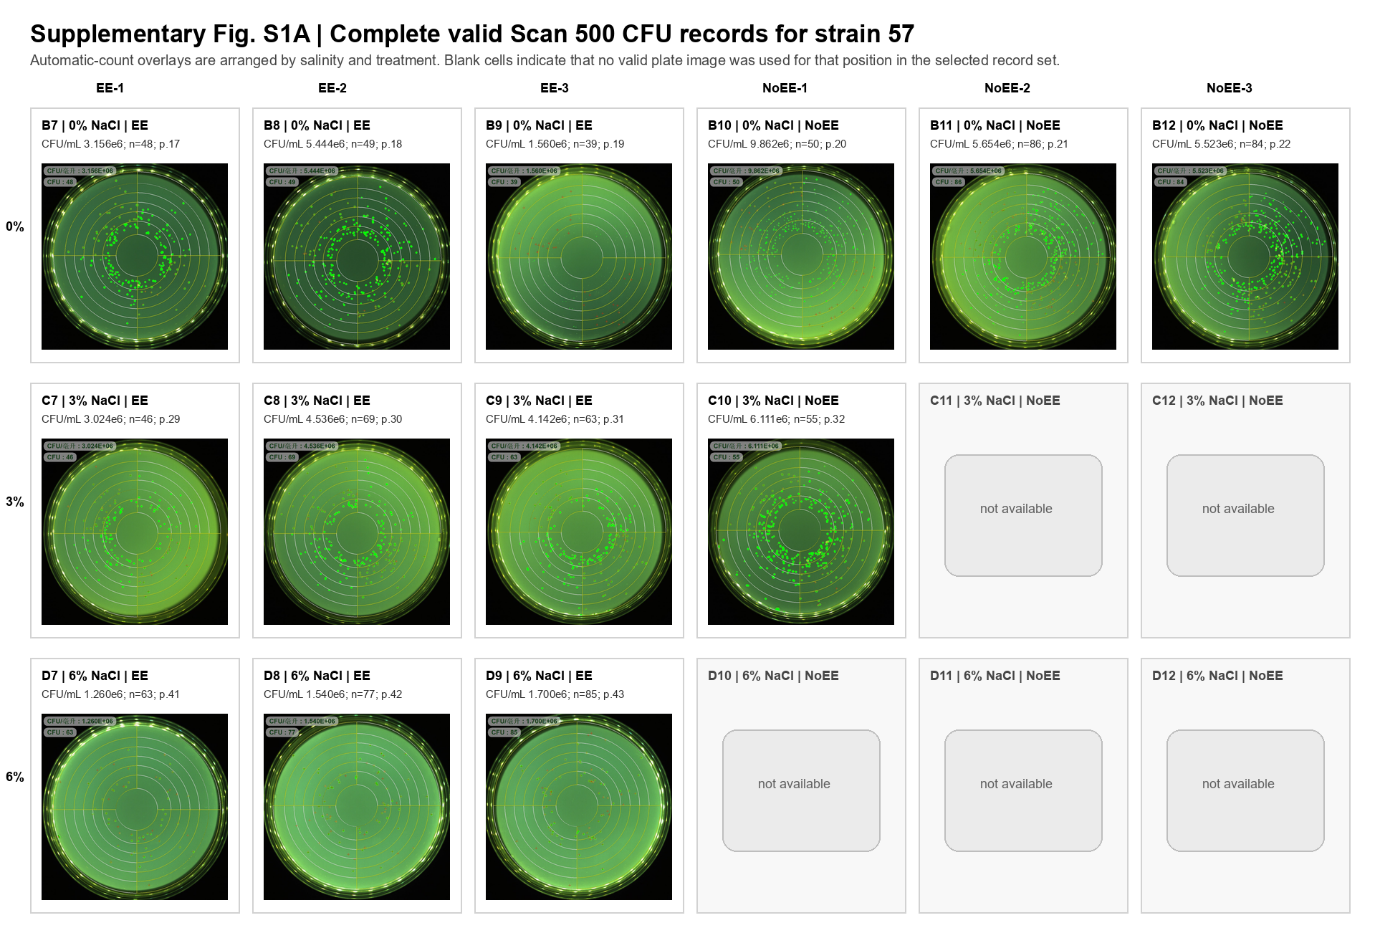


Supplementary Figure S1A. Complete valid Scan 500 automatic-count overlay images for strain 57 at 0%, 3%, and 6% NaCl. Panels are arranged by NaCl concentration and treatment group and show automatic colony detection with corresponding CFU/mL outputs.


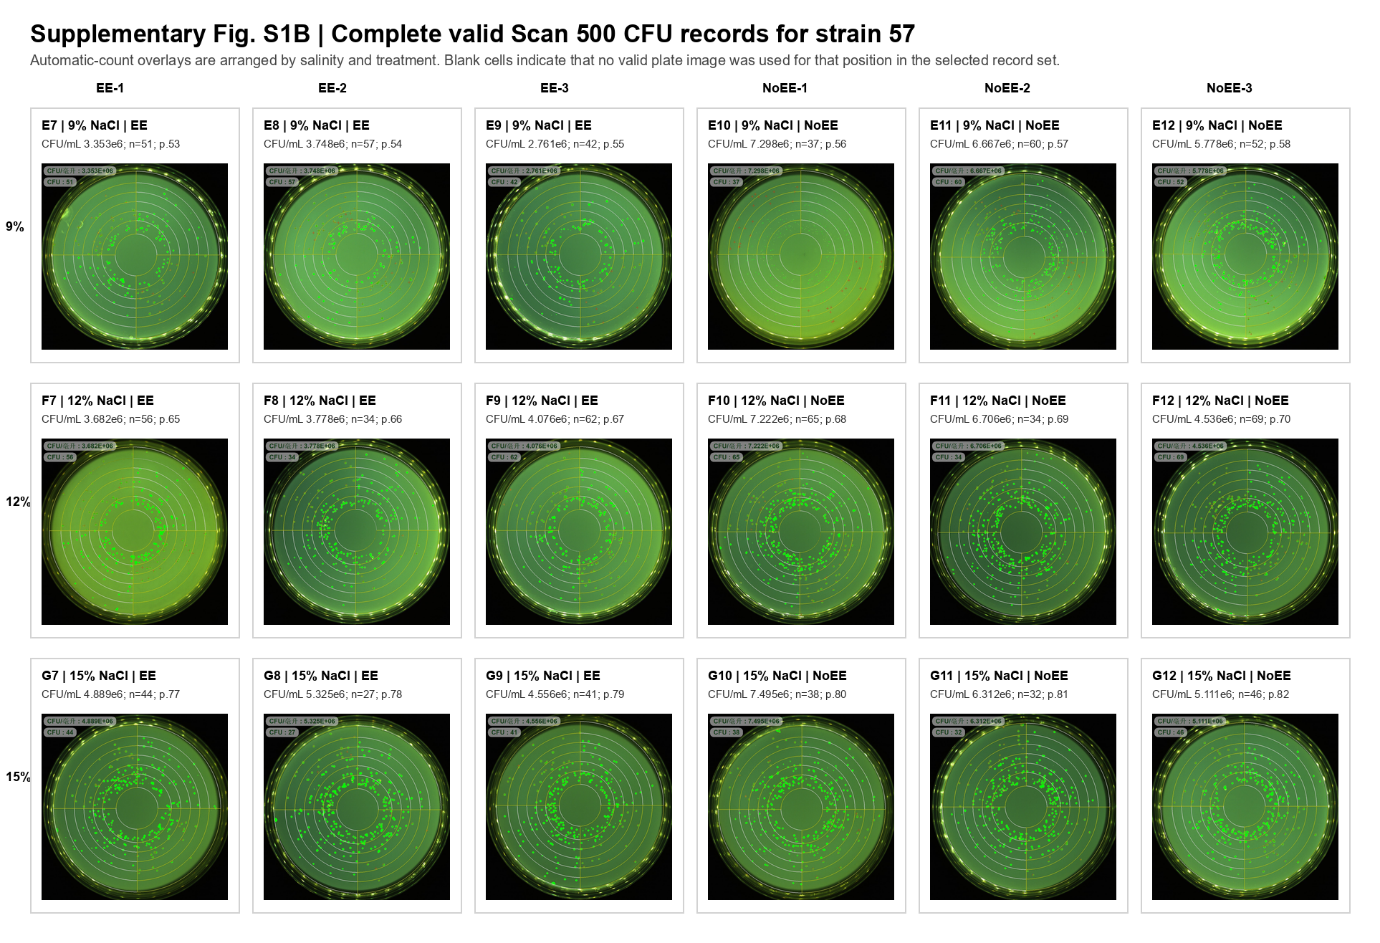


Supplementary Figure S1B. Complete valid Scan 500 automatic-count overlay images for strain 57 at 9%, 12%, and 15% NaCl. Panels are arranged by NaCl concentration and treatment group and show automatic colony detection with corresponding CFU/mL outputs.


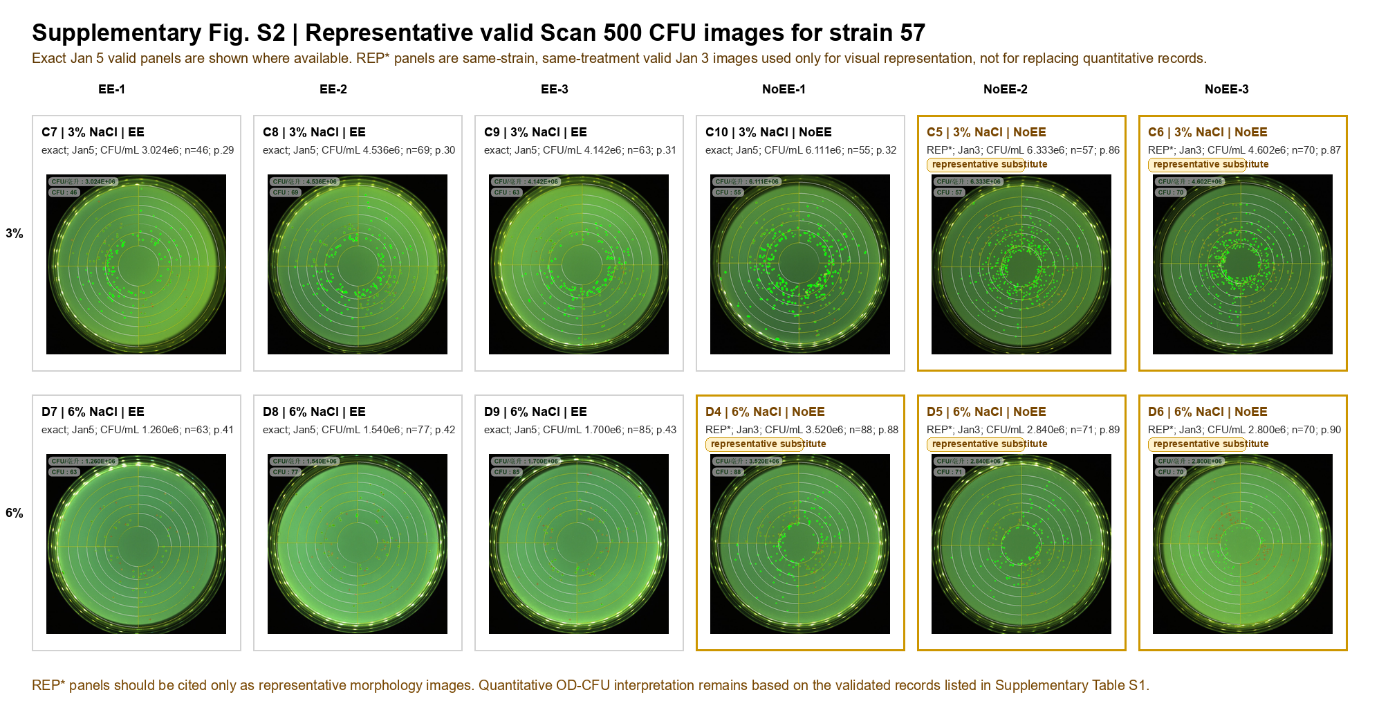


Supplementary Figure S2. Representative valid Scan 500 automatic-count images for strain 57 under 3% and 6% NaCl conditions. Quantitative OD-CFU interpretation is based on the validated records listed in Supplementary Table S1.


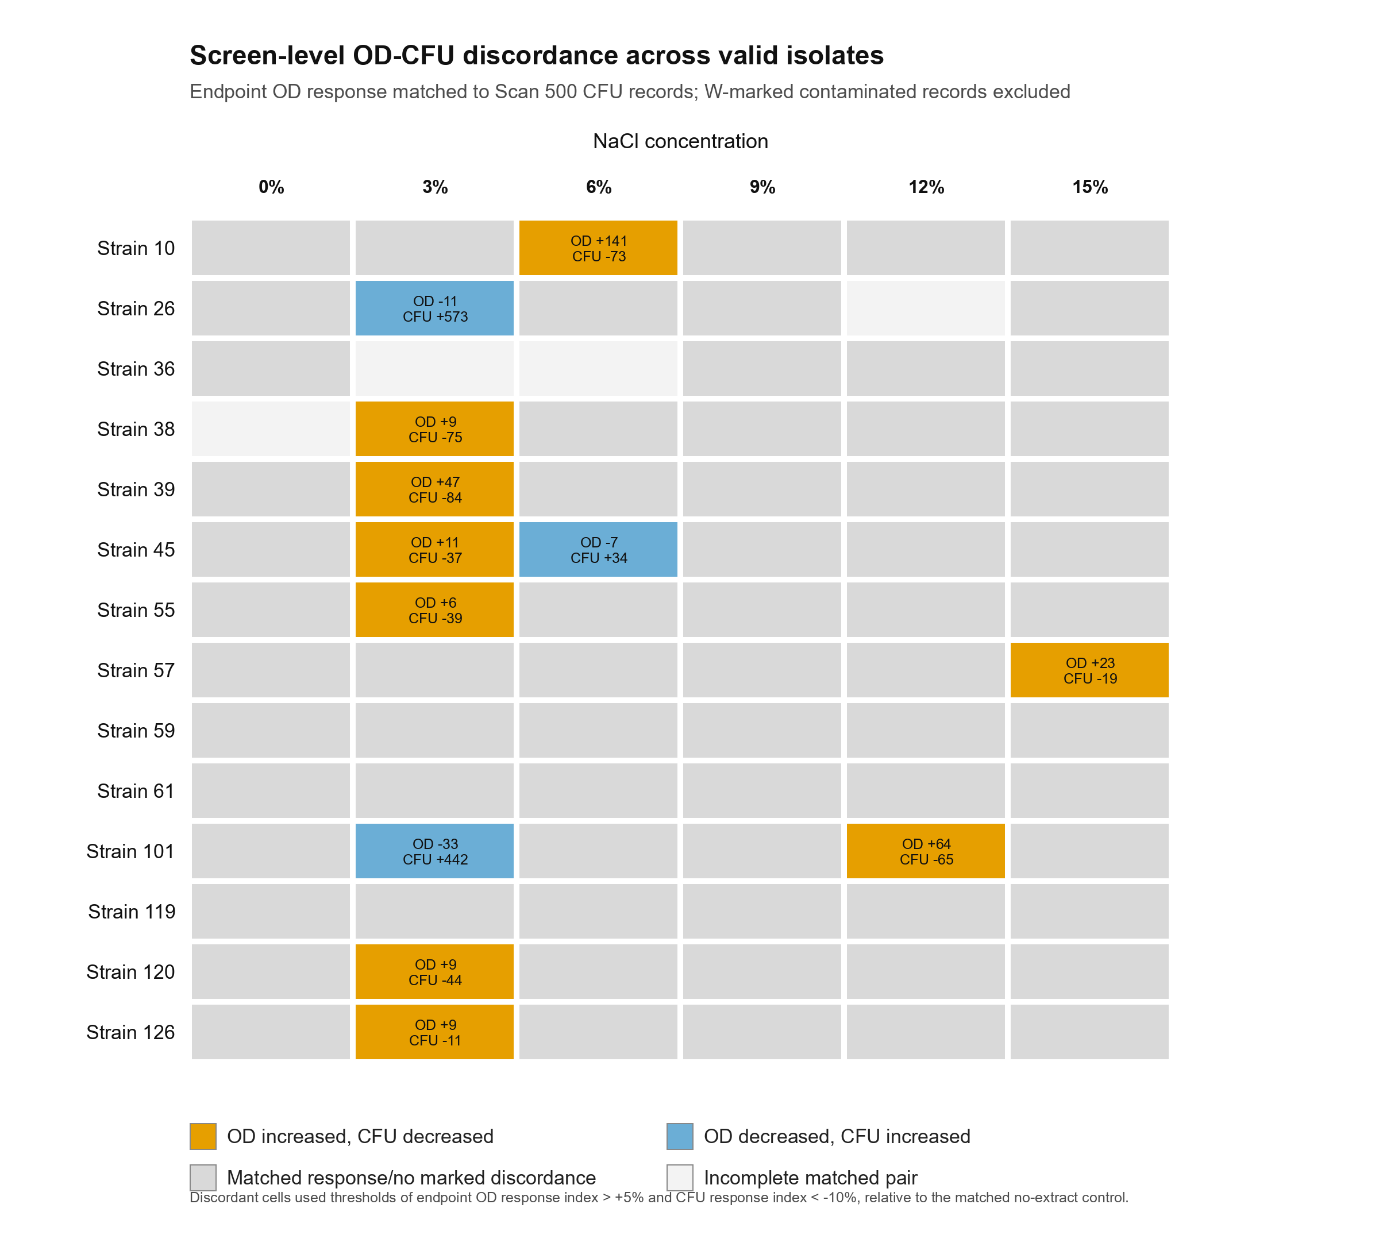


Supplementary Figure S3. Screen-level OD-CFU discordance across 14 valid isolates. Endpoint OD responses were paired with Scan 500 CFU records by strain, NaCl concentration, and treatment. Contaminated records marked with W were excluded. Orange cells indicate saline conditions in which earthworm extract increased endpoint OD by more than 5% and reduced CFU recovery by more than 10% relative to the matched no-extract control.

**Supplementary Table S2. Saline-condition OD-positive/CFU-negative cases in the 14-isolate screen.**

| **Strain** | **NaCl (%)** | **Endpoint OD WRI (%)** | **CFU WRI (%)** | **n OD EE** | **n OD NoEE** | **n CFU EE** | **n CFU NoEE** |
| --- | --- | --- | --- | --- | --- | --- | --- |
| 10 | 6 | 140.7 | -72.6 | 3 | 3 | 3 | 3 |
| 38 | 3 | 8.6 | -74.7 | 3 | 3 | 3 | 3 |
| 39 | 3 | 46.6 | -83.7 | 3 | 3 | 3 | 3 |
| 45 | 3 | 11.1 | -36.9 | 3 | 3 | 3 | 3 |
| 55 | 3 | 6.4 | -39.2 | 2 | 3 | 3 | 3 |
| 57 | 15 | 23.1 | -19.0 | 6 | 6 | 6 | 6 |
| 101 | 12 | 64.3 | -65.4 | 3 | 3 | 3 | 3 |
| 120 | 3 | 9.0 | -44.3 | 3 | 3 | 3 | 3 |
| 126 | 3 | 8.7 | -10.6 | 3 | 3 | 3 | 3 |
