# Supplementary material
Source: Research Square preprint supplement (doi:10.21203/rs.3.rs-9570797/v1)

Table 1 summarizes the main quantitative evidence.


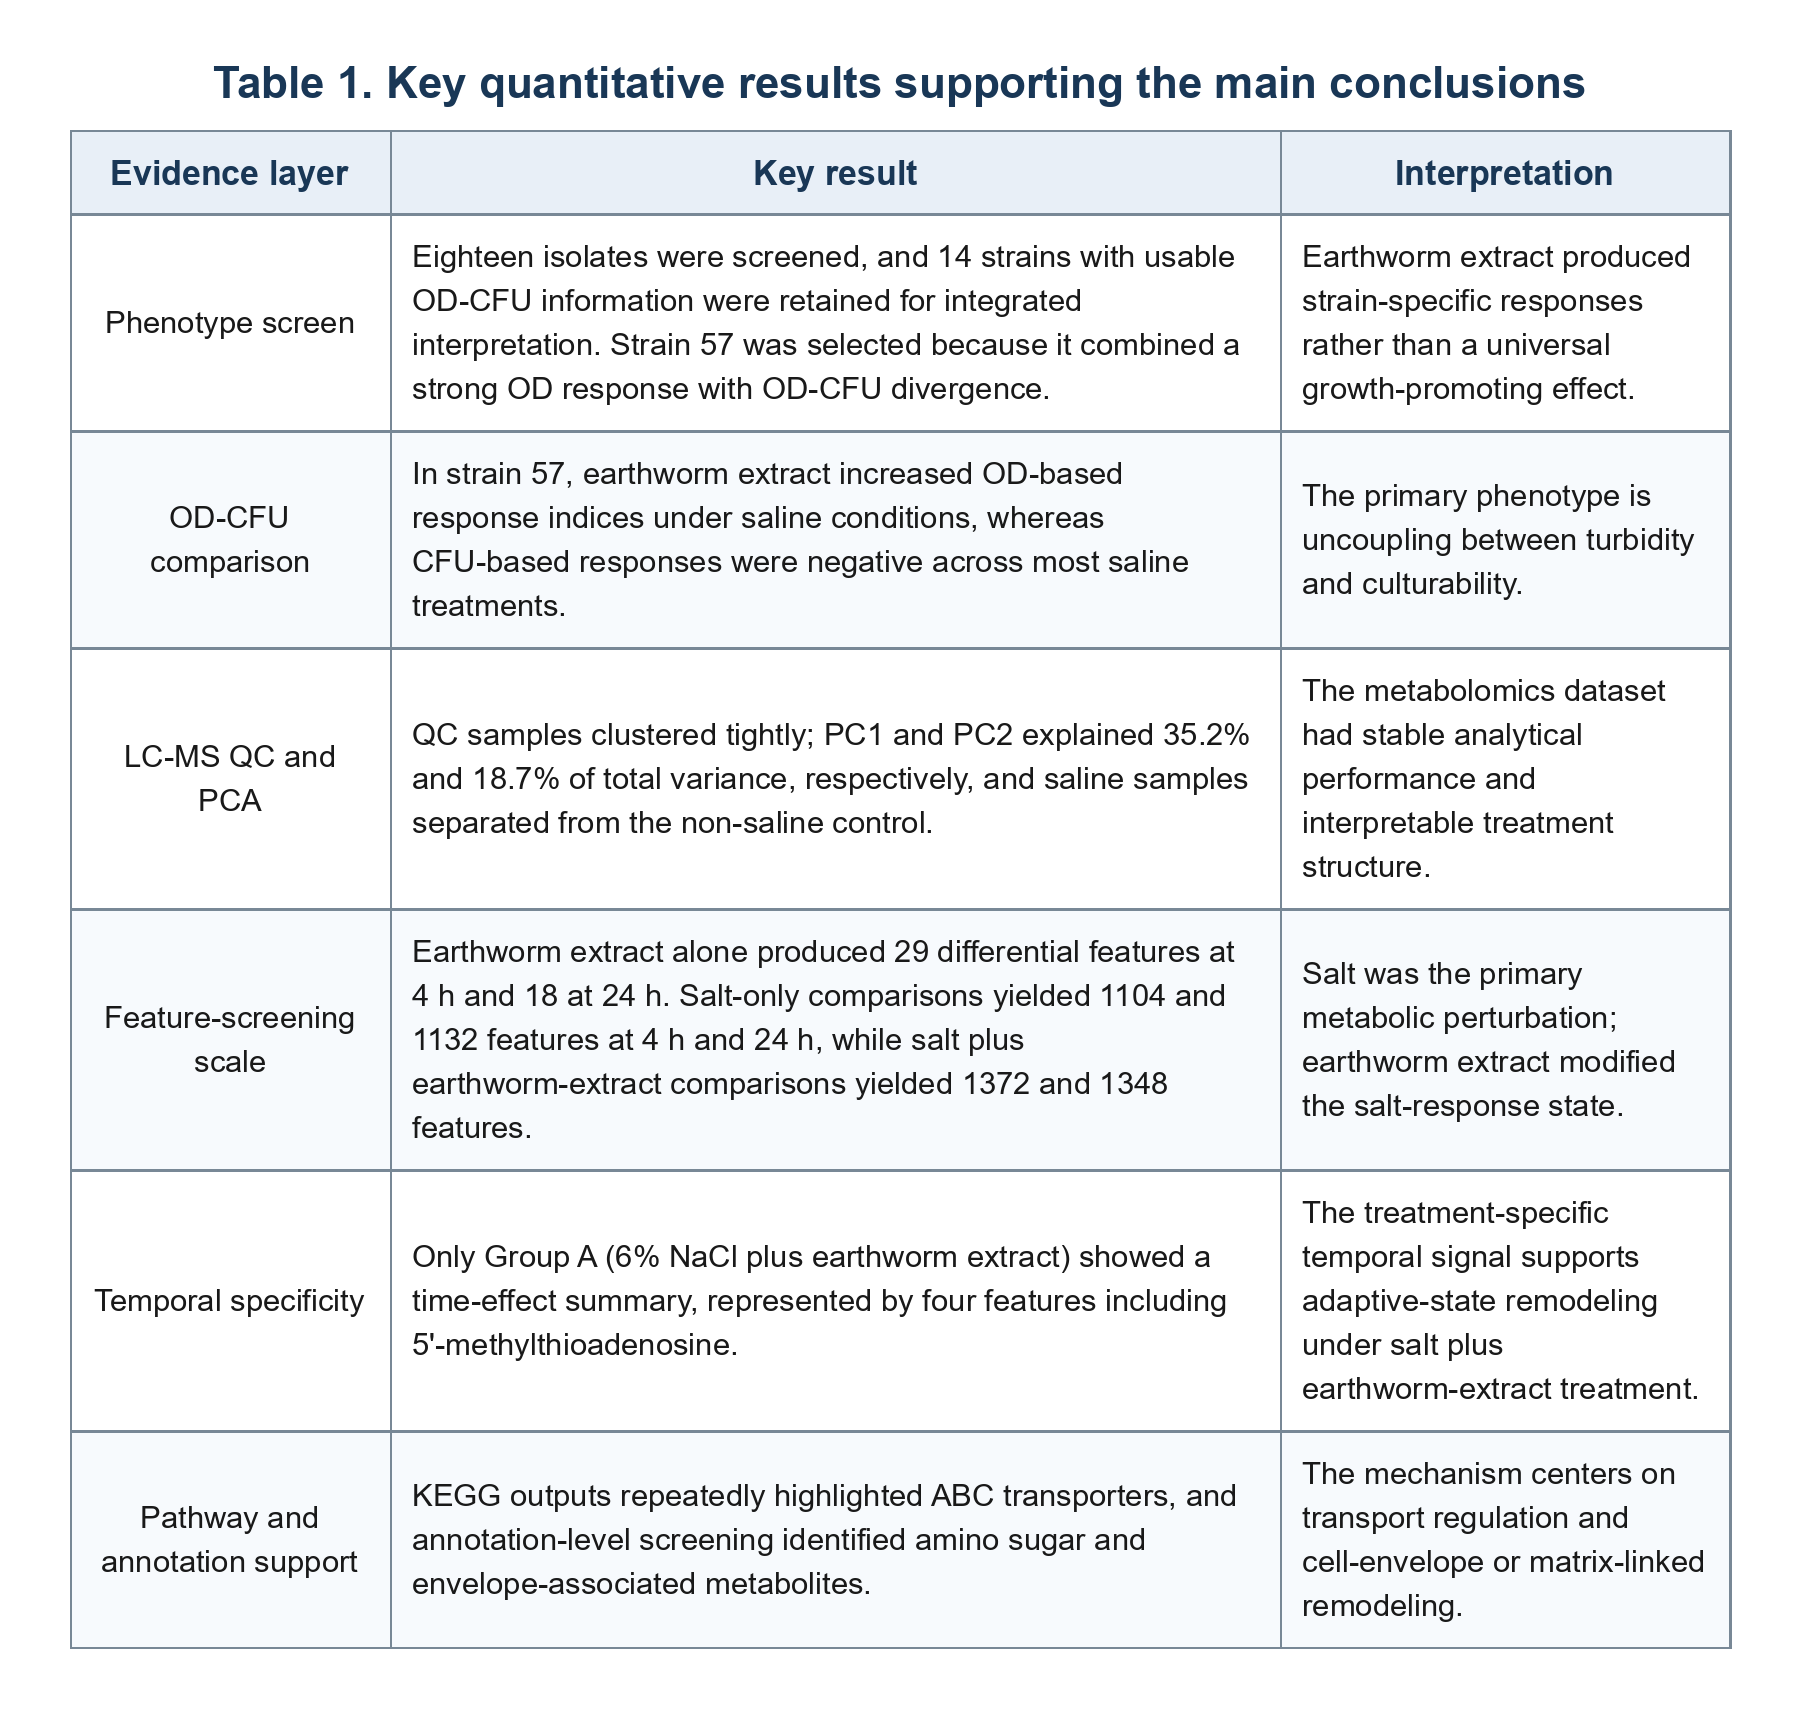

Supplement: Supplementary file 2 [file f2920d483b5ec8ab5cb48729.docx]
